# Supplementary material for: Unraveling the role of superalkalis in modulating the static and dynamic hyperpolarizabilities of emerging calix[4]arenes
Source: Royal Society of Chemistry journal article supplement (doi:10.1039/d3cp04825j), 2024-01-01
Supplement: d3cp04825j1.pdf [file d3cp04825j1.pdf]

## Supplementary Information

### Unraveling the Role of Superalkalis in Modulating Static and Dynamic Hyperpolarizabilities of Emerging Calix[4]arene

Khalida Khalil<sup>1</sup>, Shahnaz<sup>2</sup>, Ralf Ludwig<sup>3, 4, 5</sup>, Ammar M. Tighezza<sup>6</sup>, Khurshid Ayub<sup>7</sup>, Tariq  
Mahmood<sup>7, 8</sup>, Mazhar Amjad Gilani<sup>1\*</sup>

<sup>1</sup>Department of Chemistry, COMSATS University Islamabad, Lahore Campus, Lahore-54600,  
Pakistan

<sup>2</sup>Department of Chemistry, Lahore College for Women University, Lahore, Pakistan

<sup>3</sup>University of Rostock, Institute of Chemistry, Physical and Theoretical Chemistry, Albert-  
Einstein-Straße 27, Rostock 18059, Germany

<sup>4</sup>University of Rostock, Faculty of Interdisciplinary Research, Department “Science and  
Technology of Life, Light and Matter”, Rostock 18059, Germany

<sup>5</sup>Leibniz Institute for Catalysis, Rostock 18059, Germany;

<sup>6</sup>Department of Chemistry, P. O. Box 2455, College of Science, King Saud University, Riyadh  
11451, Saudi Arabia

<sup>7</sup>Department of Chemistry, COMSATS University Islamabad, Abbottabad Campus, Abbottabad-  
22060, Pakistan

<sup>8</sup>Department of Chemistry, College of Science, University of Bahrain, P.O. Box 32038, Bahrain

\*Corresponding Author

Mazhar Amjad Gilani

Email: [mazhargilani@cuilahore.edu.pk](mailto:mazhargilani@cuilahore.edu.pk)

## Coordinates of optimized geometries

### Calix[4]arene

|   |             |             |             |
|---|-------------|-------------|-------------|
| C | 1.31047400  | -2.28438200 | 0.66275800  |
| C | 2.56440300  | -2.01859100 | 0.09875500  |
| C | 2.93583000  | -2.72150300 | -1.04580000 |
| C | 2.08225900  | -3.65423600 | -1.62543500 |
| C | 0.83772800  | -3.88840800 | -1.05308400 |
| C | 0.42769900  | -3.21480100 | 0.09860900  |
| C | 3.47870300  | -0.95328300 | 0.67767500  |
| C | 3.21491400  | 0.42768300  | 0.09876500  |
| C | 3.88853900  | 0.83770600  | -1.05291300 |
| C | 3.65435500  | 2.08222400  | -1.62528600 |
| C | 2.72157000  | 2.93576800  | -1.04569800 |
| C | 2.01860300  | 2.56433400  | 0.09881800  |
| C | 2.28445600  | 1.31044200  | 0.66290100  |
| C | 0.95325100  | 3.47858500  | 0.67769600  |
| C | -0.42773500 | 3.21476700  | 0.09884100  |
| C | -0.83778600 | 3.88844900  | -1.05281700 |
| C | -2.08232900 | 3.65433900  | -1.62515000 |
| C | -2.93590100 | 2.72156600  | -1.04556100 |
| C | -2.56442200 | 2.01853400  | 0.09889200  |
| C | -1.31047500 | 2.28429100  | 0.66289900  |
| C | -3.47871800 | 0.95322600  | 0.67779600  |
| C | -3.21493900 | -0.42769900 | 0.09877500  |
| C | -3.88861400 | -0.83767400 | -1.05289200 |
| C | -3.65443500 | -2.08216600 | -1.62532600 |
| C | -2.72162100 | -2.93572600 | -1.04580700 |
| C | -2.01862000 | -2.56433300 | 0.09870400  |

|   |             |             |             |
|---|-------------|-------------|-------------|
| C | -2.28444500 | -1.31045900 | 0.66281200  |
| C | -0.95326200 | -3.47863200 | 0.67751300  |
| O | -1.60589200 | -0.98707600 | 1.81312600  |
| O | -0.98697400 | 1.60562900  | 1.81311200  |
| O | 1.60617200  | 0.98715100  | 1.81338500  |
| O | 0.98709400  | -1.60578500 | 1.81303800  |
| H | -0.93768100 | -3.40540700 | 1.76925100  |
| H | -1.22515500 | -4.51255300 | 0.44656600  |
| H | -2.52695400 | -3.90809800 | -1.49039300 |
| H | -4.61432600 | -0.16462500 | -1.50173900 |
| H | -4.51266400 | 1.22515300  | 0.44700400  |
| H | -3.40530400 | 0.93758400  | 1.76951500  |
| H | -3.90833600 | 2.52697900  | -1.49004400 |
| H | -0.16473100 | 4.61410800  | -1.50174100 |
| H | 0.93772600  | 3.40530200  | 1.76943100  |
| H | 1.22509400  | 4.51252700  | 0.44678100  |
| H | 2.52689000  | 3.90815300  | -1.49024900 |
| H | 4.61421900  | 0.16466700  | -1.50182900 |
| H | 3.40537100  | -0.93770900 | 1.76940500  |
| H | 4.51262900  | -1.22521300 | 0.44679800  |
| H | 3.90822800  | -2.52683200 | -1.49032700 |
| H | 0.16467500  | -4.61405300 | -1.50203400 |
| H | -0.01113700 | 1.52446000  | 1.90149500  |
| H | -1.52474600 | -0.01129400 | 1.90187400  |
| H | 0.01130900  | -1.52427800 | 1.90164400  |
| H | 1.52501600  | 0.01138100  | 1.90235000  |
| H | 2.38509100  | -4.19457800 | -2.51609100 |
| H | 4.19473400  | 2.38506700  | -2.51591500 |

|   |             |             |             |
|---|-------------|-------------|-------------|
| H | -2.38518400 | 4.19476900  | -2.51574500 |
| H | -4.19484700 | -2.38498100 | -2.51594500 |

**Li<sub>3</sub>O@calix[4]arene**

|   |             |             |             |
|---|-------------|-------------|-------------|
| C | 0.02830800  | 2.62473500  | 0.80271200  |
| C | -1.17746700 | 3.05261500  | 0.22926600  |
| C | -1.12468200 | 3.79692900  | -0.95219000 |
| C | 0.09224400  | 4.10387000  | -1.55469600 |
| C | 1.27327700  | 3.67890400  | -0.95734000 |
| C | 1.26725600  | 2.94472700  | 0.22904000  |
| C | -2.51441700 | 2.62675700  | 0.80980100  |
| C | -2.96203300 | 1.29822900  | 0.22093500  |
| C | -3.63641900 | 1.28874000  | -1.01298200 |
| C | -3.99810900 | 0.09304400  | -1.62265300 |
| C | -3.71044900 | -1.11563000 | -0.99013600 |
| C | -3.04260500 | -1.15214000 | 0.23570000  |
| C | -2.65871900 | 0.06826100  | 0.81803900  |
| C | -2.64032800 | -2.47561200 | 0.85512800  |
| C | -1.32950300 | -2.95787800 | 0.27852100  |
| C | -1.34479500 | -3.68175600 | -0.97829200 |
| C | -0.13928900 | -4.04523700 | -1.58667400 |
| C | 1.08654500  | -3.69384000 | -1.03060400 |
| C | 1.13400500  | -2.99241900 | 0.23262900  |
| C | -0.08253200 | -2.64262600 | 0.82830700  |
| C | 2.46508200  | -2.60746100 | 0.82687900  |
| C | 2.98515100  | -1.29923900 | 0.26414900  |
| C | 3.80171200  | -1.28627500 | -0.87368000 |
| C | 4.25120700  | -0.08906000 | -1.43574200 |
| C | 3.88246500  | 1.12250600  | -0.85512800 |

|   |             |             |             |
|---|-------------|-------------|-------------|
| C | 3.04942800  | 1.15577100  | 0.27352800  |
| C | 2.61072800  | -0.05934900 | 0.81637400  |
| C | 2.58067800  | 2.48314600  | 0.83831400  |
| O | 1.80142300  | 0.00035400  | 1.91266900  |
| O | -0.00040800 | -1.92706400 | 2.01519400  |
| O | -1.98827100 | 0.00187900  | 2.01064600  |
| O | -0.05247200 | 1.89962800  | 1.95788800  |
| H | 2.50344900  | 2.42748800  | 1.92777100  |
| H | 3.34125500  | 3.23898400  | 0.62223800  |
| H | 4.23289900  | 2.05859500  | -1.28034100 |
| H | 4.09529100  | -2.23480000 | -1.31324500 |
| H | 3.19958000  | -3.39005700 | 0.59725500  |
| H | 2.41164600  | -2.55286500 | 1.91914500  |
| H | 2.01370200  | -3.99089600 | -1.51105200 |
| H | -2.29325600 | -4.00404100 | -1.39551800 |
| H | -2.60839700 | -2.39427500 | 1.94567600  |
| H | -3.41712700 | -3.21685600 | 0.62949300  |
| H | -4.00573100 | -2.05230600 | -1.45328500 |
| H | -3.89501700 | 2.23677900  | -1.47909300 |
| H | -2.46703900 | 2.58186400  | 1.90073300  |
| H | -3.26209300 | 3.38611600  | 0.56300100  |
| H | -2.05335100 | 4.14405500  | -1.39842500 |
| H | 2.22702000  | 3.92734300  | -1.41536600 |
| H | -0.81612300 | -1.40622100 | 2.13719800  |
| H | 1.22370500  | -0.80527800 | 1.98444500  |
| H | 0.71264300  | 1.28171800  | 2.02401100  |
| H | -1.40548900 | 0.78128200  | 2.10988100  |
| H | 0.11897600  | 4.68120200  | -2.47246800 |

|    |             |             |             |
|----|-------------|-------------|-------------|
| H  | -4.52126800 | 0.10173100  | -2.57314900 |
| H  | -0.16138100 | -4.60336100 | -2.51910000 |
| H  | 4.89170300  | -0.10333400 | -2.31117500 |
| O  | 0.05074900  | -0.00641700 | -1.79806300 |
| Li | -1.18104700 | 1.10606600  | -1.59162400 |
| Li | 1.71586900  | 0.12494000  | -1.64273500 |
| Li | -0.34622000 | -1.65707000 | -1.52582100 |

**Na<sub>3</sub>O@calix[4]arene**

|   |             |             |             |
|---|-------------|-------------|-------------|
| C | 2.64158718  | 0.47332204  | -1.18530778 |
| C | 3.33180619  | -0.66149840 | -0.73286359 |
| C | 4.27588316  | -0.50271058 | 0.28361755  |
| C | 4.50151022  | 0.74283176  | 0.86694608  |
| C | 3.76703327  | 1.84238644  | 0.43224771  |
| C | 2.82902836  | 1.73340999  | -0.59795577 |
| C | 2.96782491  | -2.04063244 | -1.24637863 |
| C | 1.72017227  | -2.56711677 | -0.54991460 |
| C | 1.83267238  | -3.12559066 | 0.72683745  |
| C | 0.71760322  | -3.57284876 | 1.42320308  |
| C | -0.53444890 | -3.49655887 | 0.82510759  |
| C | -0.69249944 | -2.95967328 | -0.45008026 |
| C | 0.44153220  | -2.47546132 | -1.11389325 |
| C | -2.07186831 | -2.88807216 | -1.08584680 |
| C | -2.87914301 | -1.67778645 | -0.65348444 |
| C | -3.82922251 | -1.79165786 | 0.36496922  |
| C | -4.56912647 | -0.69430408 | 0.79641249  |
| C | -4.33705579 | 0.55398674  | 0.22190971  |
| C | -3.38051739 | 0.71803683  | -0.78221716 |
| C | -2.68395636 | -0.41424696 | -1.23196587 |

|   |             |             |             |
|---|-------------|-------------|-------------|
| C | -3.00981856 | 2.10031986  | -1.28248856 |
| C | -1.77355385 | 2.62265837  | -0.56290913 |
| C | -1.90651026 | 3.17195870  | 0.71618246  |
| C | -0.80227346 | 3.61151736  | 1.43415378  |
| C | 0.45954897  | 3.53772513  | 0.85606245  |
| C | 0.63763704  | 3.01266590  | -0.42119457 |
| C | -0.48625629 | 2.53505917  | -1.10733575 |
| C | 2.02720126  | 2.94579523  | -1.03501426 |
| O | -0.27750571 | 1.99056645  | -2.35715363 |
| O | -1.80834118 | -0.22551544 | -2.26140328 |
| O | 0.25203193  | -1.92006494 | -2.36243712 |
| O | 1.78098078  | 0.29067803  | -2.22927842 |
| H | 1.96110454  | 2.98800868  | -2.12666626 |
| H | 2.57667431  | 3.84062115  | -0.73097409 |
| H | 1.32617937  | 3.88191464  | 1.41300650  |
| H | -2.89986007 | 3.25183501  | 1.15270833  |
| H | -3.84091612 | 2.78167582  | -1.08076519 |
| H | -2.86943080 | 2.10021594  | -2.36683004 |
| H | -4.89598172 | 1.42073885  | 0.56392099  |
| H | -3.99216283 | -2.76321604 | 0.82208854  |
| H | -1.98852242 | -2.92273235 | -2.17654553 |
| H | -2.62703031 | -3.78431723 | -0.79662687 |
| H | -1.40950993 | -3.84809845 | 1.36417598  |
| H | 2.81825943  | -3.20677934 | 1.18029272  |
| H | 2.84478579  | -2.03458293 | -2.33287283 |
| H | 3.79520170  | -2.72361329 | -1.03525161 |
| H | 4.82932683  | -1.37122781 | 0.62989688  |
| H | 3.92408183  | 2.81127487  | 0.89701675  |

|    |             |             |             |
|----|-------------|-------------|-------------|
| H  | -1.16018084 | -0.96147483 | -2.34929183 |
| H  | -0.94905249 | 1.29488538  | -2.50667688 |
| H  | 1.13757419  | 1.02889383  | -2.32494613 |
| H  | 0.92654879  | -1.22351593 | -2.49508037 |
| H  | 5.23416121  | 0.85296013  | 1.65866737  |
| H  | 0.82121131  | -3.97150295 | 2.42548580  |
| H  | -5.31320076 | -0.80935288 | 1.57687573  |
| H  | -0.92048563 | 4.00332783  | 2.43752593  |
| O  | -0.04798232 | 0.01337911  | 2.67147518  |
| Na | 0.09375312  | -0.05740917 | 4.75614481  |
| Na | -1.80311508 | 0.26124140  | 1.67918731  |
| Na | 1.75239311  | -0.22077139 | 1.74804704  |

**K<sub>3</sub>O@calix[4]arene**

|   |             |             |             |
|---|-------------|-------------|-------------|
| C | 0.83818190  | -2.51673264 | 1.91092529  |
| C | -0.10161945 | -3.37273756 | 1.32092237  |
| C | -1.30847402 | -3.58962556 | 1.98421478  |
| C | -1.58673822 | -2.96278529 | 3.19474129  |
| C | -0.64920764 | -2.09683174 | 3.74475905  |
| C | 0.57552586  | -1.85429272 | 3.11809495  |
| C | 0.14732151  | -3.96933027 | -0.04985438 |
| C | -0.13195798 | -2.96430935 | -1.15695667 |
| C | -1.45551163 | -2.69483637 | -1.51878406 |
| C | -1.76415858 | -1.75096551 | -2.48990633 |
| C | -0.73363930 | -1.07948799 | -3.13856445 |
| C | 0.60059071  | -1.32201549 | -2.81792798 |
| C | 0.88400997  | -2.25166251 | -1.80684156 |
| C | 1.70402060  | -0.55224892 | -3.52630446 |
| C | 1.86994320  | 0.85764073  | -2.99231315 |



|   |             |             |             |
|---|-------------|-------------|-------------|
| C | 1.40959035  | 1.95858991  | -3.71700519 |
| C | 1.51898074  | 3.25189030  | -3.21479871 |
| C | 2.06195867  | 3.45265714  | -1.94767770 |
| C | 2.53162842  | 2.38092576  | -1.19095893 |
| C | 2.45967554  | 1.09758312  | -1.74540446 |
| C | 3.07890094  | 2.57807665  | 0.20773999  |
| C | 2.12138197  | 2.11325260  | 1.29519890  |
| C | 1.03433477  | 2.91991574  | 1.63534809  |
| C | 0.14511929  | 2.55619579  | 2.63992246  |
| C | 0.34456988  | 1.36427468  | 3.32680822  |
| C | 1.40075133  | 0.51145877  | 3.00040185  |
| C | 2.27379486  | 0.89431051  | 1.97459218  |
| C | 1.53774074  | -0.83265295 | 3.69578981  |
| O | 3.28987455  | 0.01917634  | 1.65713382  |
| O | 3.00440410  | 0.08697996  | -1.00338781 |
| O | 2.21033174  | -2.43317581 | -1.47263859 |
| O | 2.02243530  | -2.35259270 | 1.24037902  |
| H | 2.57127212  | -1.18730424 | 3.64807512  |
| H | 1.30728367  | -0.70366460 | 4.75674734  |
| H | -0.34478246 | 1.07125019  | 4.11417119  |
| H | 0.87958537  | 3.84873945  | 1.09398922  |
| H | 3.26670687  | 3.64486396  | 0.35840634  |
| H | 4.05081194  | 2.08468811  | 0.30964028  |
| H | 2.13407410  | 4.45795208  | -1.54117464 |
| H | 0.97179943  | 1.79438383  | -4.69810148 |
| H | 2.64797954  | -1.10366627 | -3.47076501 |
| H | 1.45238596  | -0.48950969 | -4.58841519 |
| H | -0.96911376 | -0.33451936 | -3.89290734 |

|   |             |             |             |
|---|-------------|-------------|-------------|
| H | -2.25545201 | -3.22725864 | -1.01104689 |
| H | 1.16322246  | -4.36810289 | -0.12331073 |
| H | -0.52318877 | -4.82256583 | -0.18519260 |
| H | -2.04141031 | -4.25624410 | 1.53830049  |
| H | -0.86442424 | -1.59356576 | 4.68327923  |
| H | 2.81122665  | -0.80994767 | -1.34994806 |
| H | 3.47616678  | 0.11692005  | 0.70315936  |
| H | 2.53694461  | -1.58166302 | 1.55923477  |
| H | 2.25714500  | -2.66220314 | -0.52424177 |
| H | -2.52863068 | -3.14290789 | 3.70128864  |
| H | -2.79596202 | -1.52105977 | -2.72657519 |
| H | 1.18924297  | 4.09866202  | -3.80923739 |
| H | -0.70353001 | 3.18960477  | 2.86935620  |
| O | -2.30895272 | 1.65549579  | -0.54469300 |
| K | -0.73837850 | 0.08446016  | 0.31932260  |
| K | -1.64099900 | 3.29794273  | -2.16988753 |
| K | -4.63264614 | 2.16664613  | -0.15127657 |

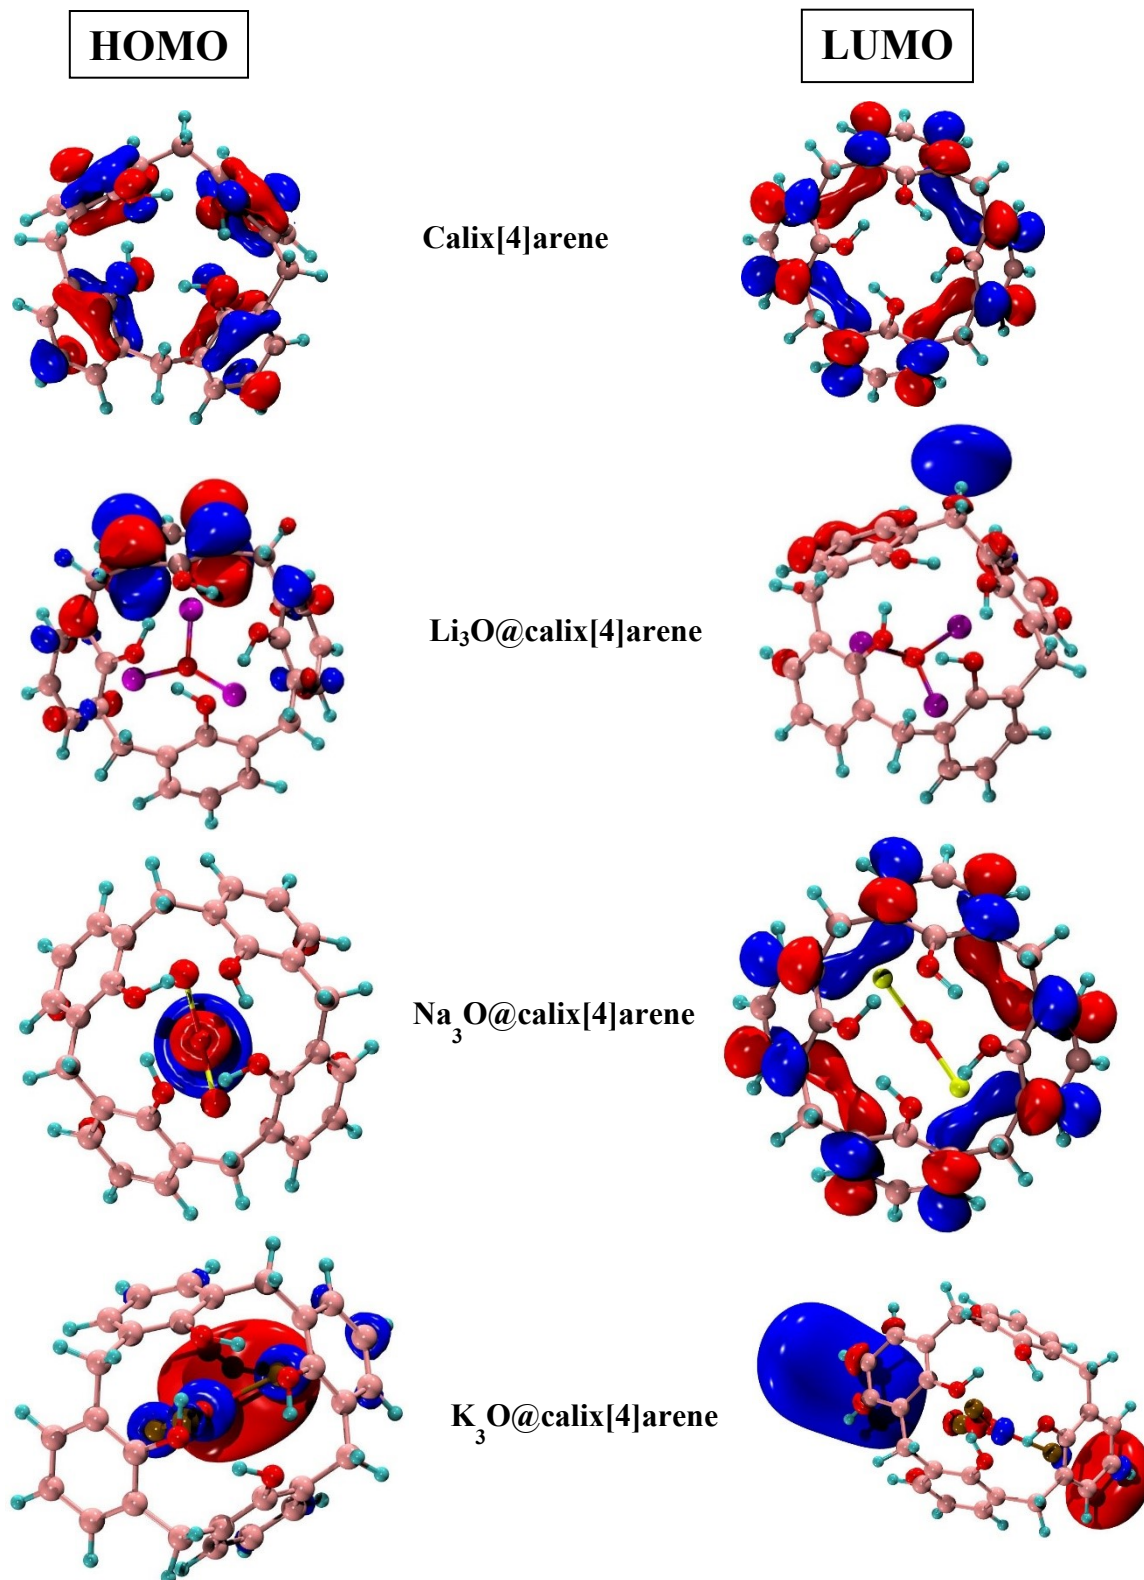

**Fig. S1:** Electronic densities of frontier molecular orbitals (HOMO = Highest Occupied Molecular Orbital, LUMO = Lowest Unoccupied Molecular Orbital) in  $\text{M}_3\text{O@calix[4]arene}$  complexes (isovalue = 0.03)

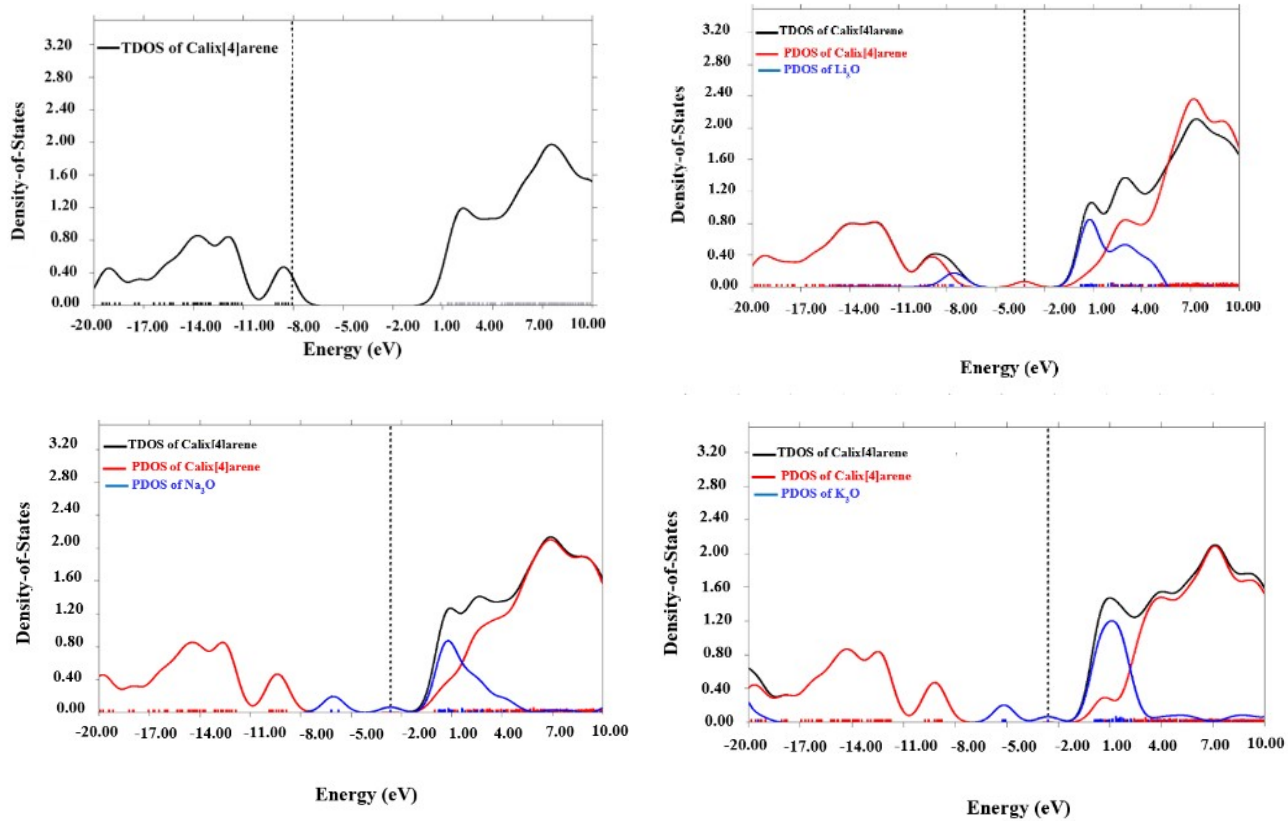

**Fig. S2:** Density of state (DOS) spectra of pure calix[4]arene (CX [4]) and  $\text{M}_3\text{O}@$  calix[4]arene complexes

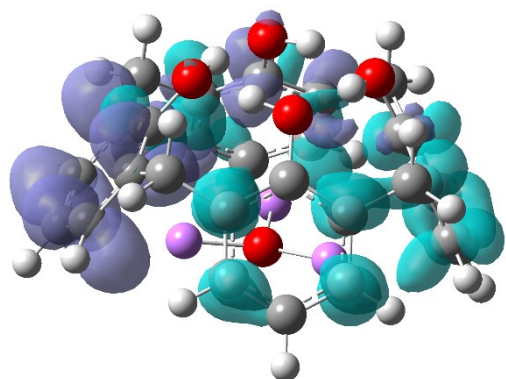

**Li<sub>3</sub>O@calix[4]arene**

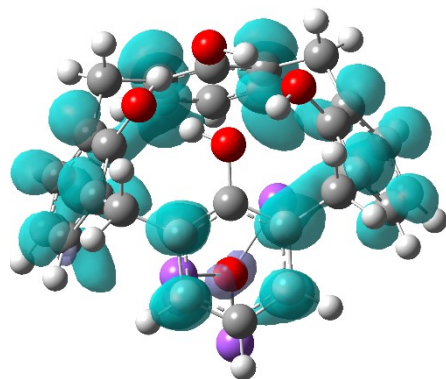

**Na<sub>3</sub>O@calix[4]arene**

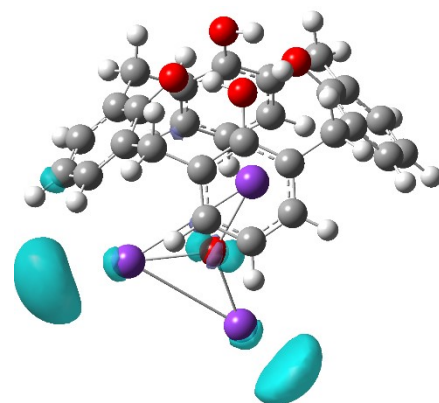

**K<sub>3</sub>O@calix[4]arene**

**Fig. S3:** Electron Density Difference (EDD) Analysis of M<sub>3</sub>O@calix[4]arene complexes (isosurface = 0.05 au)

**Table S1** The Atoms in Molecules (AIM) topological parameters, including electron density ( $\rho$ ), Laplacian of electron density ( $\nabla^2\rho$ ), electron energy density  $H(r)$  and the ratio of the kinetic electron density  $G(r)$  to potential electron density  $V(r)$  at bond critical points (BCPs) of the all SA@calix[4]arene complexes

| Complex                         | Interaction | $\rho$ | $\nabla^2\rho$ | $Hr$   | $Vr$    | $G r$  | $-G r/V r$ |
|---------------------------------|-------------|--------|----------------|--------|---------|--------|------------|
| Li <sub>3</sub> O@calix[4]arene | Li-C        | 0.015  | 0.082          | 0.0032 | -0.0139 | 0.0172 | 1.2374     |
|                                 | Li-C        | 0.011  | 0.0513         | 0.0020 | -0.0086 | 0.0107 | 1.2441     |
|                                 | Li-C        | 0.009  | 0.0474         | 0.0022 | -0.0073 | 0.0096 | 1.3150     |
|                                 | Li-O        | 0.004  | 0.0112         | 0.0003 | -0.0020 | 0.0024 | 1.200      |
|                                 | Li-C        | 0.006  | 0.0332         | 0.0015 | -0.0050 | 0.0065 | 1.300      |
| Na <sub>3</sub> O@calix[4]arene | Na-C        | 0.0064 | 0.0270         | 0.0011 | -0.0043 | 0.0055 | 1.2790     |
|                                 | Na-C        | 0.0062 | 0.0265         | 0.0011 | -0.0042 | 0.0054 | 1.2857     |
|                                 | Na-C        | 0.0062 | 0.0265         | 0.0011 | -0.0042 | 0.0054 | 1.2857     |
|                                 | Na-C        | 0.0064 | 0.0270         | 0.0011 | -0.0043 | 0.0055 | 1.2790     |
| K <sub>3</sub> O@calix[4]arene  | K-C         | 0.0014 | 0.0059         | 0.0004 | -0.0006 | 0.0010 | 1.6666     |
|                                 | K-C         | 0.0059 | 0.0208         | 0.0010 | -0.0031 | 0.0041 | 1.3225     |
|                                 | K-C         | 0.0054 | 0.0201         | 0.0009 | -0.0030 | 0.0040 | 1.333      |
|                                 | K-C         | 0.0051 | 0.0175         | 0.0008 | -0.0027 | 0.0035 | 1.2131     |
|                                 | K-C         | 0.0053 | 0.0193         | 0.0009 | -0.0030 | 0.0039 | 1.300      |
|                                 | O-C         | 0.0031 | 0.0070         | 0.0003 | -0.0011 | 0.0014 | 1.2727     |

**Table S2:** Dipole moment (Debye), polarizability (au), first hyperpolarizability (au)/(esu) for superalkali doped calix[4]arenes at  $\omega$ B97XD/6-31+(d, p)

| Complexes                       | $\mu$ | $\alpha_o$ | $\beta_o$ (au)    | $\beta_o$ (esu)        |
|---------------------------------|-------|------------|-------------------|------------------------|
| Calix[4]arene                   | 2.05  | 316        | 550               | $4.75 \times 10^{-30}$ |
| Li <sub>3</sub> O@calix[4]arene | 6.56  | 447        | $4.7 \times 10^4$ | $4.06 \times 10^{-28}$ |
| Na <sub>3</sub> O@calix[4]arene | 11.91 | 905        | $3.6 \times 10^4$ | $3.11 \times 10^{-28}$ |
| K <sub>3</sub> O@calix[4]arene  | 11.19 | 863        | $3.5 \times 10^5$ | $3.02 \times 10^{-27}$ |
